# Supplementary material
Source: Springer Nature journal article supplement (https://www.springermedizin.de/resource/supplementary/13054_2009_7626_MOESM2_ESM.pdf/9730184)
Supplement: MOESM2 [file 9730184]

Critical patients with respiratory insufficiency admitted to the ICU with positive PCR for pandemic H1N1  
N=21

Non critical patients with respiratory insufficiency admitted to the hospital with positive PCR for pandemic H1N1  
N=14

Outpatients with no respiratory insufficiency with positive PCR for pandemic H1N1  
N= 31

Excluded from analysis:  
- Two pregnant women  
- Two children under 16 yrs old  
- Seven patients whose samples were taken later than 5 days after hospital admission plus evidenced bacterial infection

**TOTAL EXCLUDED = 11 CRITICAL PATIENTS**

Excluded from analysis:  
- One 83-yr-old man  
- Three patients whose samples were taken later than 5 days after hospital admission

**TOTAL EXCLUDED = 4 PATIENTS**

Excluded from analysis:  
- Sixteen children under 16 yrs old

**TOTAL EXCLUDED = 16 PATIENTS**

Included in the analysis:  
Patients with sampling day in the first 5 days after hospital admission and no documented bacterial infection

Sample collection took place 4.5 [5.0] days after disease onset

**TOTAL INCLUDED = 10 CRITICAL PATIENTS**

Included in the analysis:  
Patients with sampling day in the first 5 days after hospital admission and no documented bacterial infection.

Sample collection took place 2.0 [1.2] days after disease onset

**TOTAL INCLUDED = 10 PATIENTS**

Included in the analysis:  
Patients with sampling day in the first contact with health services and no documented bacterial infection.

Sample collection took place 3.0 [2,7] days after disease onset

**TOTAL INCLUDED = 15 PATIENTS**

Healthy controls (n=15) were recruited between Health Care Workers at the Hospital Clínico Universitario de Valladolid and their relatives. None of them showed signs of respiratory or other focal infection or inflammatory conditions at the time of sample collection.
